# Supplementary material for: Theoretically modelling graphene-like carbon matryoshka with strong stability and particular three-center two-electron π bonds
Source: Royal Society of Chemistry journal article supplement (doi:10.1039/d1cp01307f), 2021-01-01
Supplement: d1cp01307f1.pdf [file d1cp01307f1.pdf]

## Electronic Supplementary Information (ESI)

### Theoretically Modelling Graphene-Like Carbon Matryoshka with Strong Stability and Particular Three-Center Two-Electron $\pi$ Bonds

Mengyang Li,<sup>†,#</sup> Yaoxiao Zhao,<sup>†,#</sup> Zhibin Gao,<sup>‡,\*</sup> Kun Yuan,<sup>§,\*</sup> Xiang Zhao<sup>†,\*</sup>

<sup>†</sup>*Institute of Molecular Science & Applied Chemistry, School of Chemistry, State Key Laboratory of Electrical Insulation and Power Equipment & MOE Key Laboratory for Nonequilibrium Synthesis and Modulation of Condensed Matter, Xi'an Jiaotong University, Xi'an 710049, China*

<sup>‡</sup>*Department of Physics, National University of Singapore, Singapore 117551, Republic of Singapore*

<sup>§</sup>*College of Chemical Engineering and Technology, Tianshui Normal University, Tianshui, 741001, China*

<sup>#</sup>Authors contributed equally to this work.

<sup>\*</sup>*E-mail: xzhao@mail.xjtu.edu.cn (Xiang Zhao); zhibin.gao@nus.edu.sg (Zhibin Gao);*

*yuankun@tsnu.edu.cn (Kun Yuan)*

## Table of Contents

|                                                                                                                    |     |
|--------------------------------------------------------------------------------------------------------------------|-----|
| 1. Optimal conformations of $C_nH_2$ ( $2 \leq n \leq 8$ ) Figure S1.....                                          | S3  |
| 2. Stiffness tensor matrixes for L-2Gy and L-3Gy Table S1.....                                                     | S3  |
| 3. Crystal structures and Localized orbital locator (LOL) maps for graphene and $\alpha Gy$ (L-1Gy) Figure S2..... | S4  |
| 4. Molecular AdNDP orbitals for the optimized benzene ( $C_6H_6$ ) Figure S3.....                                  | S5  |
| 5. Molecular AdNDP orbitals for the optimized $C_{18}H_6$ Figure S4.....                                           | S6  |
| 6. Partial Molecular AdNDP orbitals for the optimized $C_{30}H_6$ Figure S5.....                                   | S7  |
| 7. Band structure of L-2Gy based on the HSE06 Figure S6.....                                                       | S8  |
| 8. Stiffness tensor matrixes for graphene and $\alpha Gy$ (L-1Gy) Table S2.....                                    | S8  |
| 9. Possible absorbed configurations of H atom on L-2Gy Figure S7.....                                              | S9  |
| 10. Computational Details.....                                                                                     | S9  |
| 11. Fractional coordinates for primitive cell of L-2Gy and L-3Gy.....                                              | S10 |

## 1. Optimal conformations of $C_nH_2$ ( $2 \leq n \leq 8$ )

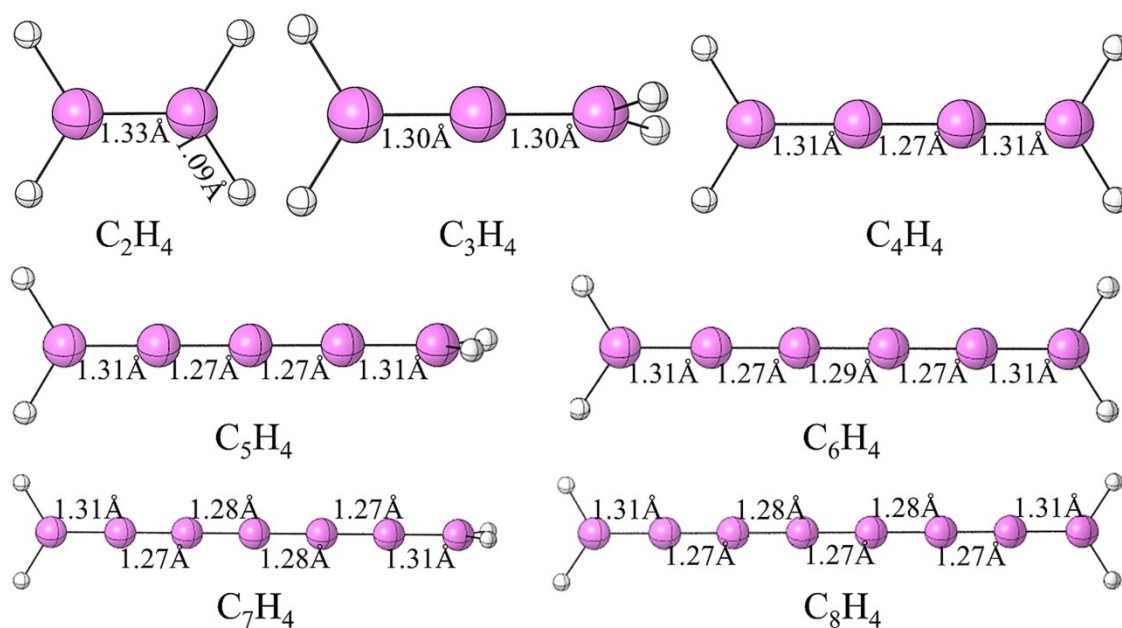

**Figure S1** Optimal conformations of  $C_nH_2$  ( $2 \leq n \leq 8$ ) based on the B3LYP/6-311G(d,p).

## 2. Stiffness tensor matrixes for L-2Gy and L-3Gy

**Table S1** Stiffness tensor  $C_{ij}$  in GPa matrixes for L-2Gy and L-3Gy.

| L-2Gy |        |        |       |       |       |       |
|-------|--------|--------|-------|-------|-------|-------|
|       | $C_1$  | $C_2$  | $C_3$ | $C_4$ | $C_5$ | $C_6$ |
| $C_1$ | 25.029 | 23.359 | 0.445 | 0.000 | 0.000 | 0.000 |
| $C_2$ | 23.359 | 25.029 | 0.445 | 0.000 | 0.000 | 0.000 |
| $C_3$ | 0.445  | 0.445  | 1.557 | 0.000 | 0.000 | 0.000 |
| $C_4$ | 0.000  | 0.000  | 0.000 | 0.835 | 0.000 | 0.000 |
| $C_5$ | 0.000  | 0.000  | 0.000 | 0.000 | 0.523 | 0.000 |
| $C_6$ | 0.000  | 0.000  | 0.000 | 0.000 | 0.000 | 0.523 |
| L-3Gy |        |        |       |       |       |       |
|       | $C_1$  | $C_2$  | $C_3$ | $C_4$ | $C_5$ | $C_6$ |
| $C_1$ | 18.615 | 18.209 | 0.336 | 0.000 | 0.000 | 0.000 |
| $C_2$ | 18.209 | 18.615 | 0.336 | 0.000 | 0.000 | 0.000 |
| $C_3$ | 0.336  | 0.336  | 1.161 | 0.000 | 0.000 | 0.000 |
| $C_4$ | 0.000  | 0.000  | 0.000 | 0.203 | 0.000 | 0.000 |
| $C_5$ | 0.000  | 0.000  | 0.000 | 0.000 | 0.331 | 0.000 |
| $C_6$ | 0.000  | 0.000  | 0.000 | 0.000 | 0.000 | 0.331 |

### 3. Crystal structures and Localized orbital locator (LOL) maps for graphene and $\alpha$ Gy (L-1Gy)

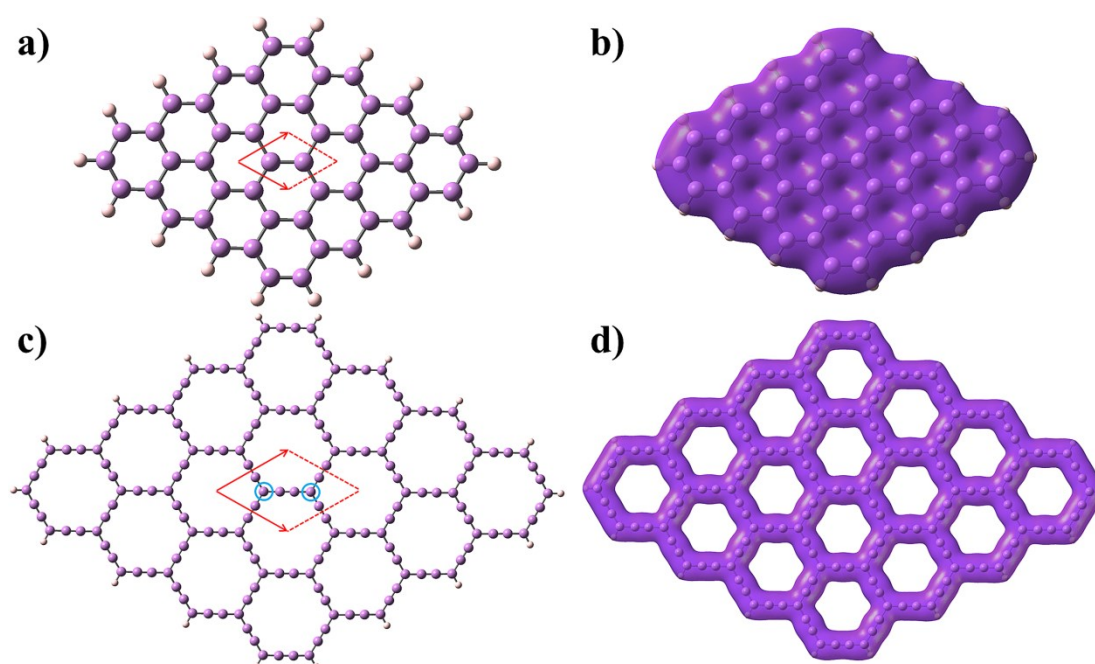

**Figure S2** Crystal structures of a) graphene and c)  $\alpha$ Gy (L-1Gy). The marginal threefold carbon atoms are saturated by hydrogen atoms and their primitive cells are marked by a red box. Localized orbital locator (LOL) maps for b) graphene and d)  $\alpha$ Gy (L-1Gy) with isovalue of 0.05.

#### 4. Molecular AdNDP orbitals for the optimized benzene ( $C_6H_6$ )

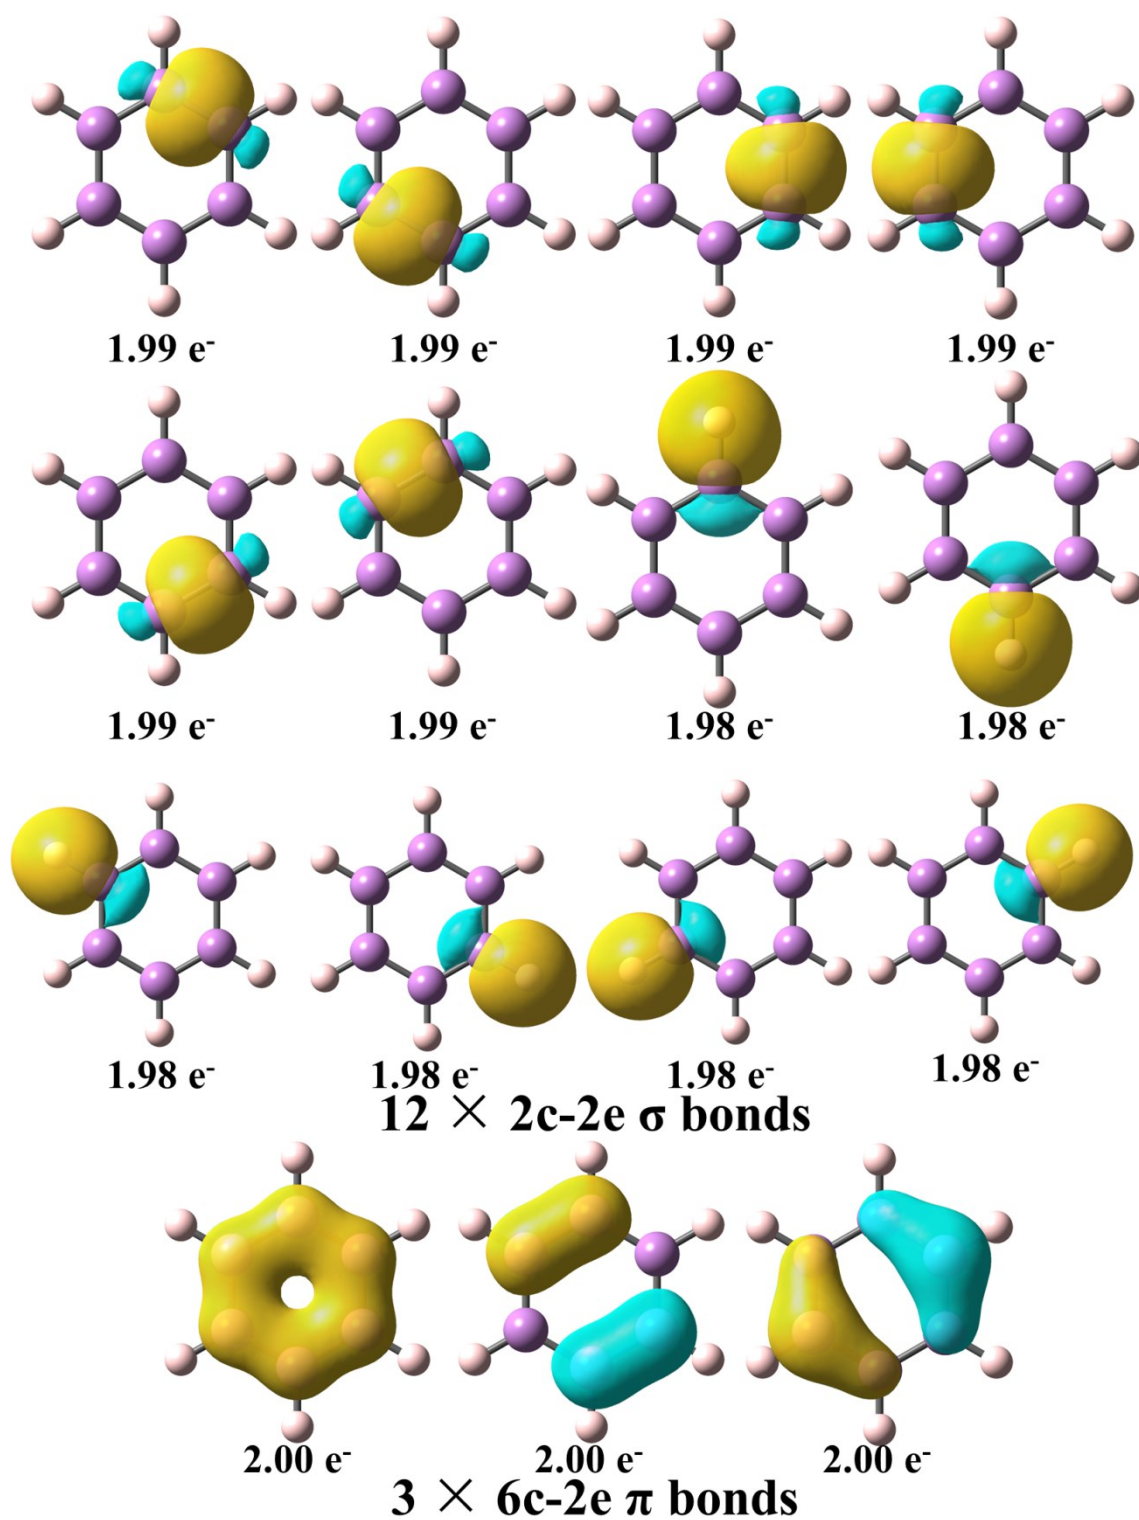

**Figure S3** Molecular orbitals for the optimized benzene ( $C_6H_6$ ) based on the AdNDP method.

5. Molecular AdNDP orbitals for the optimized  $C_{18}H_6$

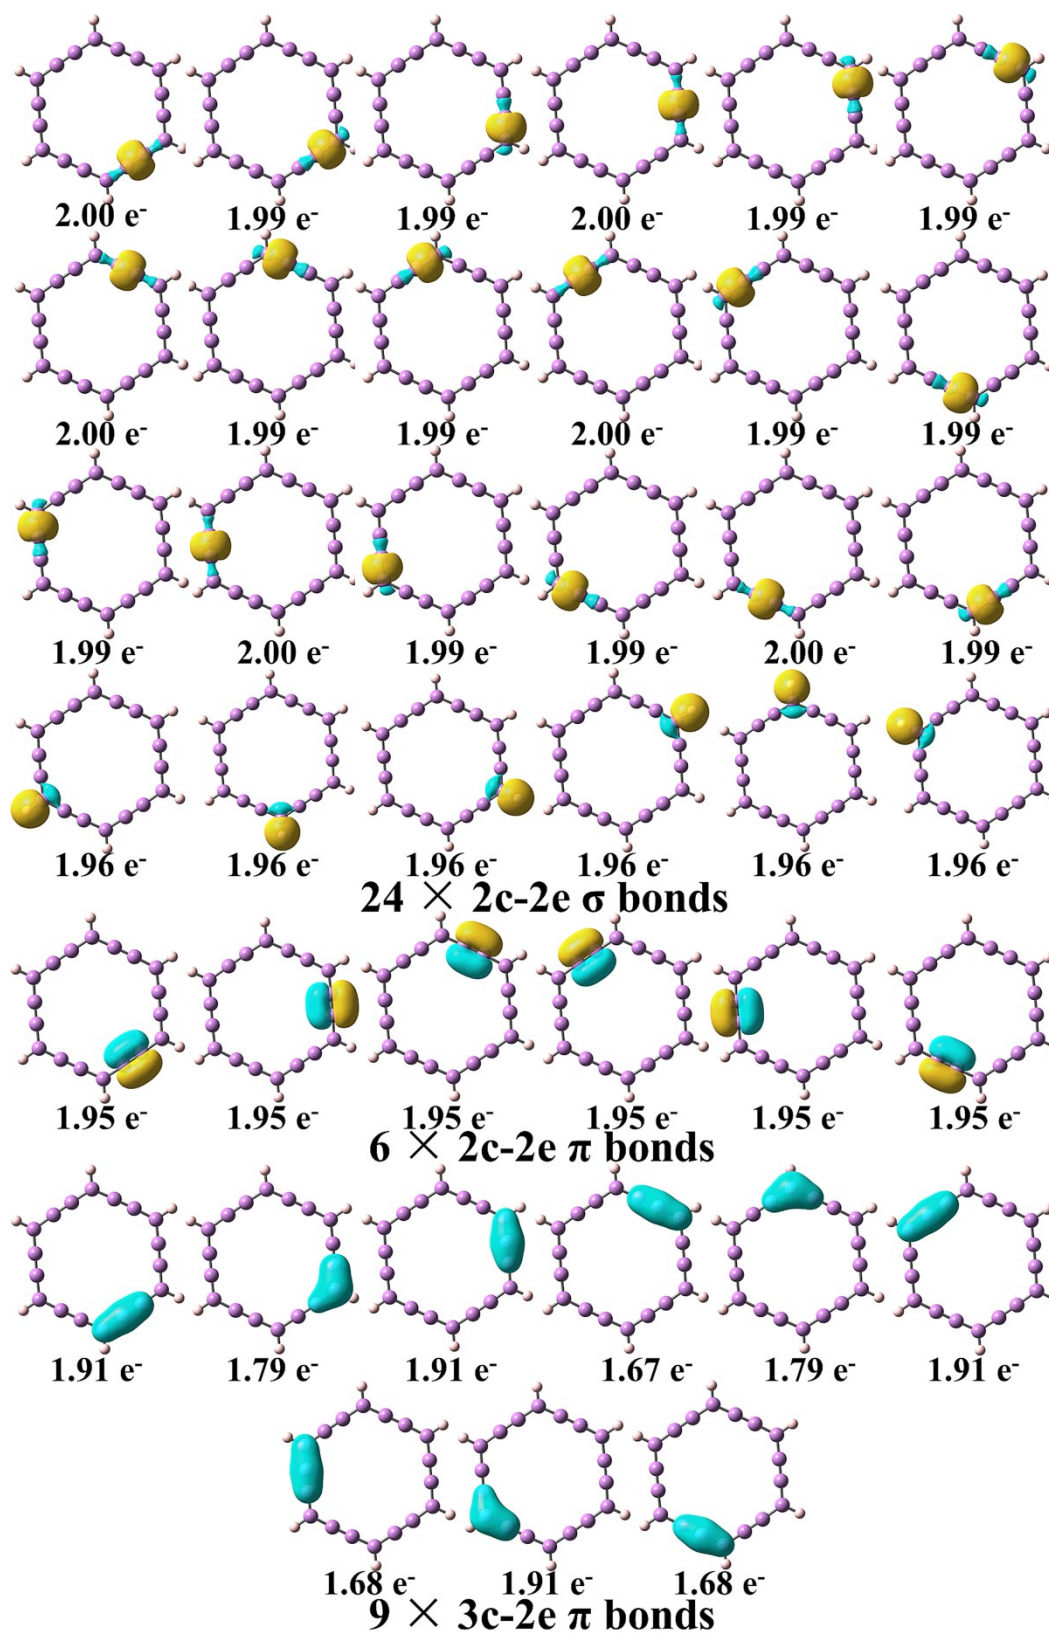

**Figure S4** Molecular orbitals for the optimized  $C_{18}H_6$  based on the AdNDP method.

6. Partial Molecular AdNDP orbitals for the optimized  $C_{30}H_6$

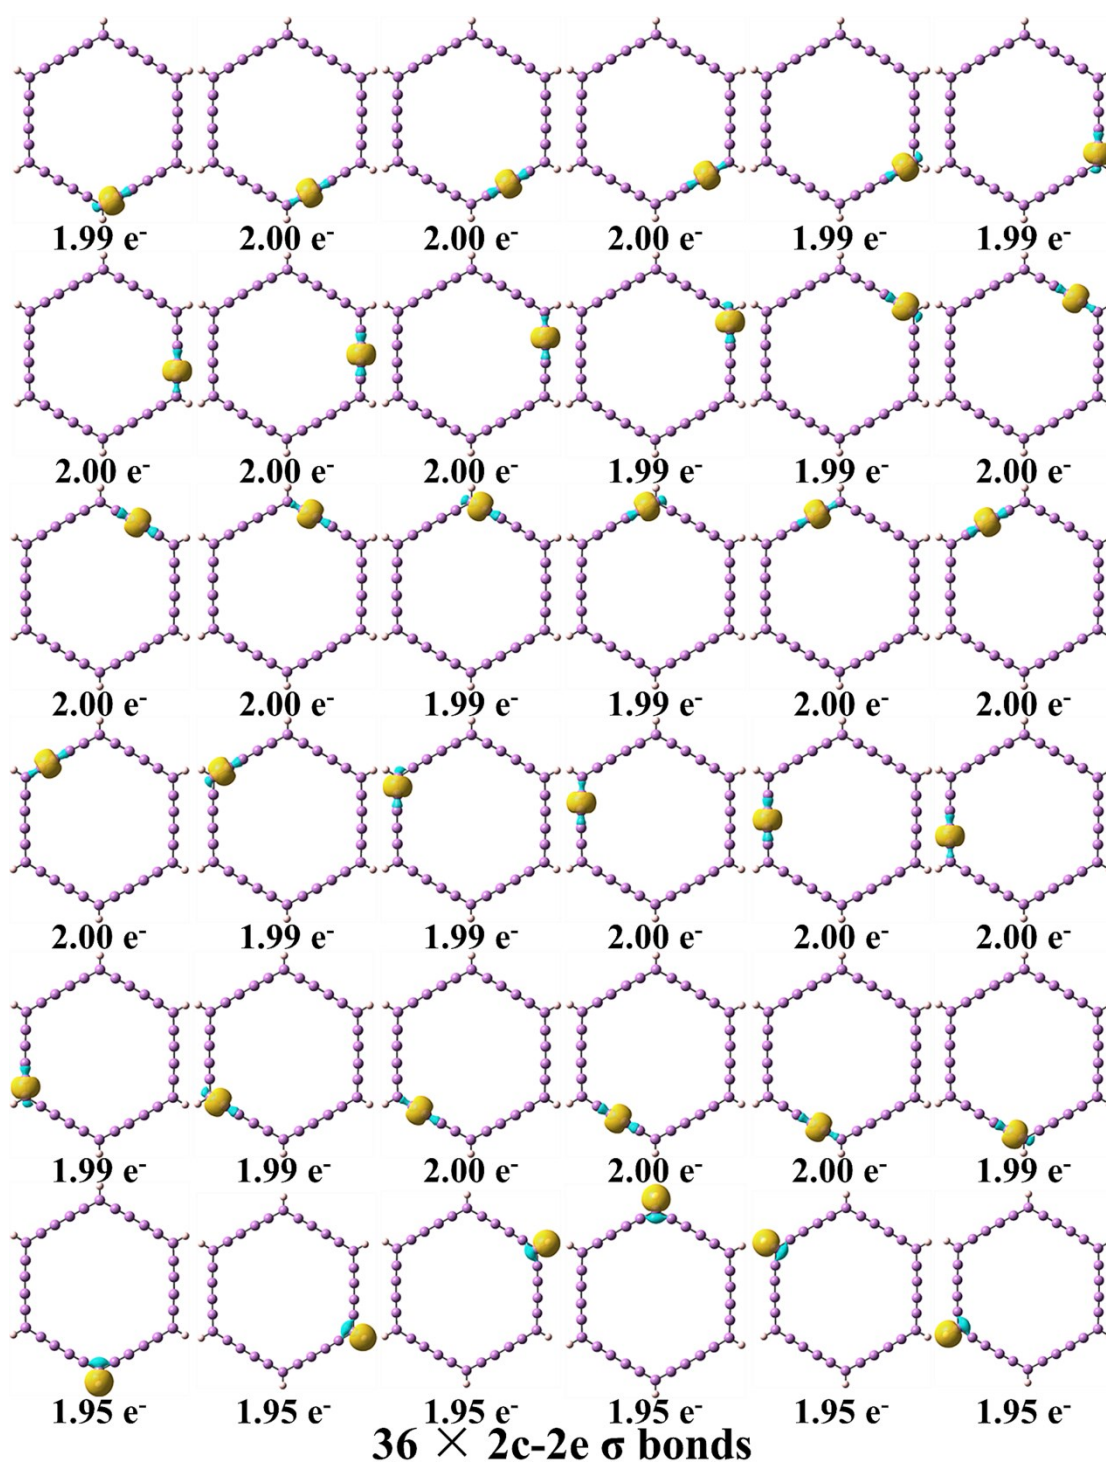

**Figure S5** Molecular orbitals of 2c-2e  $\sigma$  bonds for the optimized  $C_{30}H_6$  based on the AdNDP method.

## 7. Band structure of L-2Gy based on the HSE06

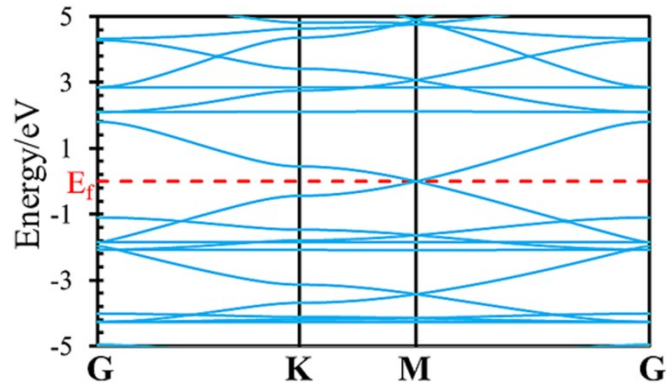

**Figure S6** Band structure of L-2Gy based on the HSE06 level.

## 8. Stiffness tensor matrixes for graphene and $\alpha$ Gy (L-1Gy)

Table S2 Stiffness tensor  $C_{ij}$  in GPa matrixes for graphene and  $\alpha$ Gy (L-1Gy).

| <b>Graphene</b>              |         |         |       |        |       |       |
|------------------------------|---------|---------|-------|--------|-------|-------|
|                              | $C_1$   | $C_2$   | $C_3$ | $C_4$  | $C_5$ | $C_6$ |
| $C_1$                        | 145.979 | 27.143  | 1.287 | 0.000  | 0.000 | 0.000 |
| $C_2$                        | 27.143  | 145.979 | 1.287 | 0.000  | 0.000 | 0.000 |
| $C_3$                        | 1.287   | 1.287   | 4.467 | 0.000  | 0.000 | 0.000 |
| $C_4$                        | 0.000   | 0.000   | 0.000 | 59.418 | 0.000 | 0.000 |
| $C_5$                        | 0.000   | 0.000   | 0.000 | 0.000  | 1.327 | 0.000 |
| $C_6$                        | 0.000   | 0.000   | 0.000 | 0.000  | 0.000 | 1.327 |
| <b><math>\alpha</math>Gy</b> |         |         |       |        |       |       |
|                              | $C_1$   | $C_2$   | $C_3$ | $C_4$  | $C_5$ | $C_6$ |
| $C_1$                        | 40.194  | 34.574  | 0.685 | 0.000  | 0.000 | 0.000 |
| $C_2$                        | 34.574  | 40.194  | 0.685 | 0.000  | 0.000 | 0.000 |
| $C_3$                        | 0.685   | 0.685   | 2.380 | 0.000  | 0.000 | 0.000 |
| $C_4$                        | 0.000   | 0.000   | 0.000 | 2.810  | 0.000 | 0.000 |
| $C_5$                        | 0.000   | 0.000   | 0.000 | 0.000  | 0.754 | 0.000 |
| $C_6$                        | 0.000   | 0.000   | 0.000 | 0.000  | 0.000 | 0.754 |



## 9. Possible absorbed configurations of H atom on L-2Gy

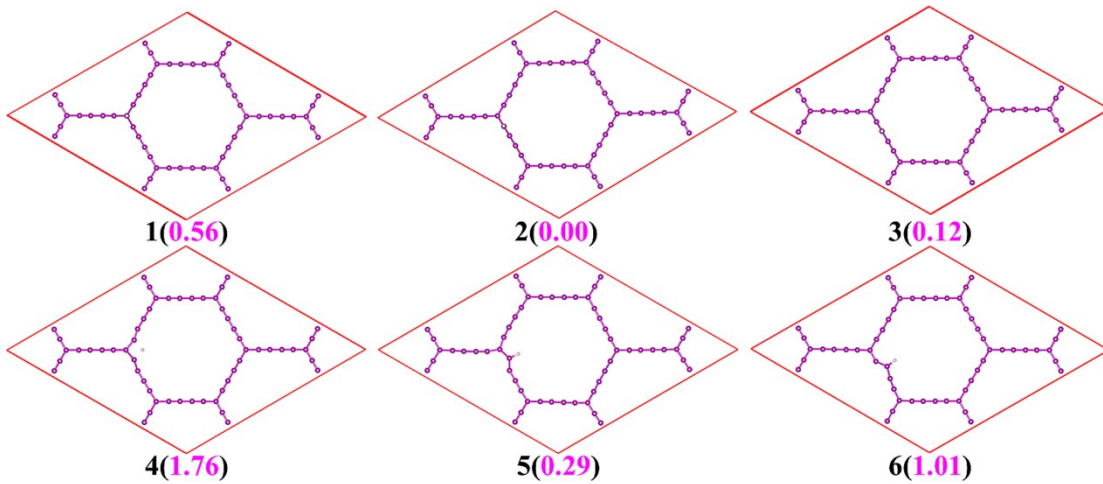

**Figure S7** Possible absorbed configurations of H atom on L-2Gy including their relative energies marked in pink shown in brackets. H atoms are on the top of corresponding carbon atoms for configurations in **1**, **2**, and **3**. The configurations of **4**, **5**, and **6** are that H atoms in the plane of L-2Gy.

## 10 Computational Details

The hydrogen evolution reaction (HER) performance is evaluated with the free energy of absorbed hydrogen atom under equilibrium conditions, which is defined as<sup>[1-4]</sup>

$$\Delta G_H = E_{ads} + \Delta ZPE - T\Delta S$$

where  $E_{ads}$  is the adsorption energy of the hydrogen atom,  $\Delta ZPE$  is the change of zero-point energy of absorbed H and that of free  $H_2(g)$ ,  $T\Delta S$  is the difference of entropy of absorbed H and that of  $H_2(g)$ . We employ the ZPE and TS of free  $H_2$  gas molecule from previous work, while for the adsorbed H, the free energy corrections were calculated using the corresponding formula including ZPE and S obtained from T. Vegge's work using vibrational frequency based on the harmonic approximation. The  $E_{ads}$ ,  $\Delta ZPE$ , and  $T\Delta S$  are calculated with the following equations<sup>[5]</sup>

$$E_{ads} = E_{*H} - E_S - 1/2E_{H_2}$$

$$\Delta ZPE = ZPE_{*H} - 1/2ZPE_{H_2}$$

$$T\Delta S = TS_{vi-*H} - 1/2TS_{H_2}$$

where  $E^{*H}$  and  $E_s$  represent the total energy of L-2Gy with and without adsorbed H, respectively, and  $E_{H_2}$  is the energy of the hydrogen molecule in the gas phase.  $ZPE^{*H}$  and  $ZPE_{H_2}$  are on behalf of the zero-point energy of absorbed H and that of free  $H_2(g)$ , respectively.  $TS_{vi-*H}$  is the vibrational entropy of absorbed H while  $TS_{H_2}$  is the entropy of  $H_2(g)$  of 0.41 eV. The previous report shows that the vibrational entropy in the absorbed state is small meaning that the entropy of adsorption of  $1/2H_2$  is  $\Delta S_H \cong -1/2S_{H_2}$ .<sup>[6]</sup> Thus, the  $\Delta S$  here is calculated to be -0.205 eV.

**11 Fractional coordinates for 14 and 20 independent carbon atoms for optimized primitive cell of L-2Gy and L-3Gy, respectively.**

| L-2Gy              |                    |                    |
|--------------------|--------------------|--------------------|
| 0.6666666666666643 | 0.3333333333333357 | 0.5000000000000000 |
| 0.3333333333333357 | 0.6666666666666643 | 0.5000000000000000 |
| 0.5961842373225368 | 0.4038157626774633 | 0.5000000000000000 |
| 0.4038157626774633 | 0.5961842373225368 | 0.5000000000000000 |
| 0.5961842373225368 | 0.1923684746450664 | 0.5000000000000000 |
| 0.4038157626774633 | 0.8076315253549337 | 0.5000000000000000 |
| 0.8076315253549337 | 0.4038157626774633 | 0.5000000000000000 |
| 0.1923684746450664 | 0.5961842373225368 | 0.5000000000000000 |
| 0.5336413338968912 | 0.4663586661031087 | 0.5000000000000000 |
| 0.4663586661031087 | 0.5336413338968912 | 0.5000000000000000 |
| 0.5336413338968912 | 0.0672826677937754 | 0.5000000000000000 |
| 0.4663586661031087 | 0.9327173322062244 | 0.5000000000000000 |
| 0.9327173322062244 | 0.4663586661031087 | 0.5000000000000000 |
| 0.0672826677937754 | 0.5336413338968912 | 0.5000000000000000 |
| L-3Gy              |                    |                    |
| 0.6666667000000004 | 0.3333333800000028 | 0.5000000000000000 |
| 0.3333333030000034 | 0.6666666050000032 | 0.5000000000000000 |
| 0.6159786295070929 | 0.3840212944929078 | 0.5000000000000000 |
| 0.3840213474929087 | 0.6159787205070898 | 0.5000000000000000 |
| 0.6159786905070944 | 0.2319573190141839 | 0.5000000000000000 |
| 0.3840212984929082 | 0.7680426599858180 | 0.5000000000000000 |
| 0.7680426829858163 | 0.3840213294929072 | 0.5000000000000000 |
| 0.2319573380141819 | 0.6159786495070946 | 0.5000000000000000 |
| 0.4773309774685701 | 0.5226689635314288 | 0.5000000000000000 |
| 0.5226690125314292 | 0.4773310154685661 | 0.5000000000000000 |
| 0.4773310154685661 | 0.9546620319371358 | 0.5000000000000000 |
| 0.5226689895314309 | 0.0453379790628617 | 0.5000000000000000 |
| 0.0453379550628668 | 0.5226689635314288 | 0.5000000000000000 |
| 0.9546620339371360 | 0.4773310154685661 | 0.5000000000000000 |
| 0.5708670658543540 | 0.4291329401456463 | 0.5000000000000000 |
| 0.4291329061456436 | 0.5708670038543561 | 0.5000000000000000 |
| 0.5708669838543544 | 0.1417341537087101 | 0.5000000000000000 |
| 0.4291329351456495 | 0.8582658082912938 | 0.5000000000000000 |

|                    |                    |                    |
|--------------------|--------------------|--------------------|
| 0.8582657942912928 | 0.4291329041456434 | 0.5000000000000000 |
| 0.1417341647087075 | 0.5708670748543513 | 0.5000000000000000 |

## References

- [1] Jalil, A.; Zhuo, Z. W.; Sun, Z. T.; Wu, F.; Wang, C.; Wu, X. J.; A Phosphorene-Like InP 3 Monolayer: Structure, Stability, and Catalytic Properties toward the Hydrogen Evolution Reaction. *J. Mater. Chem. A* **2020**, *8*, 1307-1314.
- [2] Tan, T. L.; Wang, L. L.; Johnson, D. D.; Bai, K.; A Comprehensive Search for Stable Pt–Pd Nanoalloy Configurations and Their Use as Tunable Catalysts. *Nano Lett.* **2012**, *12*, 4875-4880.
- [3] Mir, S. H.; Chakraborty, S.; Jha, P. C.; Wärnå, J.; Soni, H.; Jha, P. K.; Ahuja, R.; Two-Dimensional Boron: Lightest Catalyst for Hydrogen and Oxygen Evolution Reaction. *Appl. Phys. Lett.* **2016**, *109*, 053903.
- [4] Liu, Y. P.; Yu, G. T.; Li, G. D.; Sun, Y. H.; Asefa, T.; Chen, W.; Zou, X. X.; Coupling Mo<sub>2</sub>C with Nitrogen-Rich Nanocarbon Leads to Efficient Hydrogen-Evolution Electrocatalytic Sites. *Angew. Chem. Int. Ed.* **2015**, *127*, 10902-10907;
- [5] Howalt, J. G.; Bligaard, T.; Rossmeisl, J.; Vegge, T.; DFT Based Study of Transition Metal Nano-Clusters for Electrochemical NH<sub>3</sub> Production. *Phys. Chem. Chem. Phys.* **2013**, *15*, 7785-7795.
- [6] Nørskov, J. K.; Bligaard, T.; Logadottir, A.; Kitchin, J. R.; Chen, J.; Pandelov, S.; Stimming, U.; Trends in the Exchange Current for Hydrogen Evolution. *J. Electrochem. Soc.* **2005**, *152*, J23-J26.
